# Supplementary material
Source: publisher figshare collection journal article supplement (https://acs.figshare.com/ndownloader/files/24165953)
Supplement: Supplementary file 1 [file 24165953]

Archive with 3 entries (3 files):
- info.xml
- pr0c00303_high_quality.mp4
- pr0c00303.pdf
