# Supplementary material
Source: publisher figshare collection journal article supplement (https://acs.figshare.com/ndownloader/files/24165953)
Supplement: Supplementary file 1 [file 24165953 › info.xml]

<presentation>
	<article>
		<title>PEPPI-MS: polyacrylamide gel-based prefractionation for analysis of intact proteoforms and protein complexes by mass spectrometry</title>
		<doi>10.1021/acs.jproteome.0c00303</doi>
		<copyright>American Chemical Society</copyright>
		<narrator>Ayako Takemori, Robert J Beynon, Joseph A Loo, Lissa C Anderson, David S Butcher, Nobuaki Takemori</narrator>
		<contact>Ayako Takemori, Robert J Beynon, Joseph A Loo, Lissa C Anderson, David S Butcher, Nobuaki Takemori</contact>
		<contact-email>ayakot@m.ehime-u.ac.jp, R.Beynon@liverpool.ac.uk, jloo@chem.ucla.edu, anderson@magnet.fsu.edu, dbutcher@magnet.fsu.edu, takemori@m.ehime-u.ac.jp</contact-email>
		<author-list>
			<author>Nobuaki Takemori</author>
		</author-list>
	</article>
	<slides height-width-ratio=".75">
		<slide audio-time="24">
			<subtitle/>
		</slide>
		<slide audio-time="131">
			<subtitle/>
		</slide>
		<slide audio-time="19">
			<subtitle/>
		</slide>
		<slide audio-time="161">
			<subtitle/>
		</slide>
		<slide audio-time="121">
			<subtitle/>
		</slide>
		<slide audio-time="72">
			<subtitle/>
		</slide>
		<slide audio-time="82">
			<subtitle/>
		</slide>
		<slide audio-time="21">
			<subtitle/>
		</slide>
	</slides>
	<audio duration="631"/>
</presentation>
